# Supplementary material for: Environmental Stability and Long-term Variability of Harpacticoid Copepod Assemblages
Source: Research Square preprint supplement (doi:10.21203/rs.3.rs-1213096/v1), 2022-01-11
Supplement: Supplementary file 1 [file e6fbfc6d67cb61cd8b27c349.xlsx]

## Sheet: Metadata
ELECTRONIC SUPPLEMENTARY MATERIAL
ENVIRONMENTAL STABILITY AND LONG-TERM VARIABILITY
OF HARPACTICOID COPEPOD ASSEMBLAGES
MARINE BIOLOGY
Andrey I. Azovsky*, Elena S. Chertoprud & Lesya A. Garlitska
* Correspondence: Andrey I. Azovsky (aiazovsky@mail.ru)
	Online Resource 4. Full species list with annual occurrences at each site

## Sheet: Occurrence ALL DATA
YEAR	1996	1996	1998	1998	1998	1999	1999	2000	2001	2001	2001	2003	2013	2013	2013	2017	2017	2017	2018	2018	2018	2019	2019	2019	2020	2020	2020			OCCURRENCE (% of sites with a species records)
SITE	A	B	A	B	C	B	C	B	A	B	C	B	A	B	C	A	B	C	A	B	C	A	B	C	A	B	C			1996-2013	2017-2020
Ameira parvula	0	0	0	0	0	0	0	0	1	0	1	1	0	0	0	0	0	0	0	0	0	0	0	0	0	0	0			20	0
Ameira scotti	0	0	0	0	0	0	0	0	0	0	0	0	0	0	0	0	0	0	1	0	0	0	0	0	0	0	0			0	8.33333
Amphiascoides dispar	1	0	1	1	0	0	0	0	0	1	0	0	0	0	0	0	0	0	0	0	0	0	0	0	0	0	0			26.6667	0
Danielssenia typica	0	0	0	0	0	1	0	0	0	0	0	0	0	0	0	0	0	0	0	0	0	0	0	0	0	0	0			6.66667	0
Delavalia palustris	1	1	1	1	1	1	0	0	1	1	1	1	1	1	1	1	1	1	1	1	1	1	1	1	1	1	1			86.6667	100
Diarthrodes major	0	0	0	0	0	0	0	0	0	0	0	0	0	0	0	0	0	0	0	0	0	0	1	0	0	0	0			0	8.33333
Ectinosoma compressum	0	0	0	0	0	0	0	0	1	0	0	0	0	0	0	0	0	0	0	0	0	0	0	0	0	0	0			6.66667	0
Ectinosoma melaniceps	0	0	0	0	0	1	0	0	0	0	0	0	1	1	0	0	0	0	0	0	0	0	0	0	0	0	0			20	0
Eurycletodes similis	0	0	0	1	1	0	0	0	0	0	0	0	0	0	0	0	0	0	0	0	0	0	0	0	0	0	0			13.3333	0
Halectinosoma brevirostre	0	0	0	0	0	0	0	0	1	1	0	0	1	0	0	1	1	1	1	1	1	1	1	1	1	1	0			20	91.6667
Halectinosoma chislenki	0	0	0	0	0	0	0	0	0	0	0	0	0	0	0	0	0	0	0	0	0	0	0	0	1	0	1			0	16.6667
Halectinosoma curticorne	1	1	1	0	0	0	0	0	1	1	0	1	1	0	1	1	1	1	1	1	1	1	1	1	1	1	1			53.3333	100
Halectinosoma elongatum	0	0	0	0	0	0	0	0	0	0	0	0	0	0	0	1	1	1	1	0	0	1	1	1	1	1	1			0	83.3333
Halectinosoma gothipes	0	0	1	0	0	0	0	0	0	0	0	0	0	0	0	1	1	1	1	0	1	1	1	1	1	0	1			6.66667	83.3333
Halectinosoma herdmani	0	0	0	0	0	0	0	0	0	0	0	0	0	0	0	1	1	0	1	1	1	1	0	1	1	0	1			0	75
Halectinosoma neglectum	0	1	0	0	0	1	0	0	0	1	0	1	1	0	0	1	1	1	1	1	1	1	1	0	0	0	0			33.3333	66.6667
Heterolaophonte littoralis	0	0	0	0	0	1	1	0	1	0	1	0	1	1	0	0	1	1	0	1	0	1	1	1	0	1	1			40	66.6667
Heterolaophonte minuta	1	1	1	1	1	1	1	1	1	1	1	1	1	1	1	1	1	1	1	1	1	1	1	1	1	1	1			100	100
Huntemannia jadensis	1	1	1	1	1	1	1	1	1	1	1	1	1	1	1	0	1	1	1	1	1	0	1	1	1	1	1			100	83.3333
Longipedia sp.	0	1	0	0	0	0	0	0	0	0	0	0	0	0	0	0	0	0	0	0	0	0	0	0	0	0	0			6.66667	0
Mesochra lilljeborgi	0	0	0	0	0	0	0	0	0	0	0	0	1	0	0	1	1	0	1	1	1	1	1	1	1	1	1			6.66667	91.6667
Mesochra pygmea	0	0	0	0	0	0	0	0	0	0	0	0	1	0	0	1	1	1	0	1	1	1	0	0	1	1	1			6.66667	75
Mesochra rapiens	0	0	0	0	0	0	0	0	0	0	0	0	0	0	0	0	0	0	0	0	1	0	0	1	0	0	0			0	16.6667
Microsetella_norvegica	1	1	1	0	0	0	0	0	0	0	0	0	0	0	0	0	0	0	0	0	0	0	0	0	0	0	0			20	0
Nannopus procerus	0	0	1	0	1	0	0	0	1	1	1	1	1	1	1	1	1	1	1	1	1	1	1	1	1	1	1			60	100
Nitocra spinipes	0	0	0	0	0	0	0	0	0	0	0	0	0	0	1	0	0	1	0	0	0	1	1	1	0	0	1			6.66667	41.6667
Nitocra typica	0	0	0	0	0	0	0	0	0	0	0	0	0	0	1	1	1	1	1	1	1	1	1	1	1	1	1			6.66667	100
Paralaophonte karmensis	0	0	0	0	0	0	0	0	0	0	0	0	0	1	0	0	1	0	0	0	1	0	0	0	0	0	0			6.66667	16.6667
Paralaophonte perplexa	0	0	0	0	0	0	0	0	1	0	0	0	0	0	0	0	0	0	0	0	0	0	0	0	0	0	0			6.66667	0
Paraleptastacus kliei	0	0	0	1	1	1	1	1	0	1	1	1	0	1	1	0	1	1	0	1	1	0	0	1	0	1	1			66.6667	58.3333
Parastenhelia spinosa	0	1	1	1	0	0	0	1	0	0	1	1	0	0	0	0	0	0	0	0	0	0	0	0	0	0	0			40	0
Platychelipus littoralis	1	1	1	0	0	1	0	1	1	1	0	1	1	1	1	0	1	1	0	1	1	0	0	0	0	0	1			73.3333	41.6667
Proameira hiddensoensis	0	0	0	0	0	0	0	0	0	0	0	0	0	0	0	1	1	1	0	1	1	0	0	1	0	0	1			0	58.3333
Schizopera ornata	0	0	0	0	0	0	0	0	0	0	0	0	0	0	0	0	0	0	0	0	0	0	0	1	0	0	0			0	8.33333
Tachidius discipes	0	0	0	1	1	1	1	0	1	1	1	1	1	1	1	1	1	1	1	1	1	1	1	1	1	1	1			73.3333	100
Tisbe sp.	0	0	0	0	0	1	0	0	0	0	0	0	0	0	0	0	0	0	0	0	0	0	0	0	0	0	0			6.66667	0
Vermicaris minuta	0	0	0	0	0	0	0	1	0	1	1	0	0	0	1	0	0	0	0	0	0	0	0	0	0	0	0			26.6667	0
